# Supplementary material for: Sol narae (Sona) is a Drosophila ADAMTS involved in Wg signaling
Source: PubMed Central journal article supplement (PMC4989167; doi:10.1038/srep31863), 2016-08-18

## **Sol narae (Sona) is a *Drosophila* ADAMTS involved in Wg signaling**

Go-Woon Kim<sup>†§</sup>, Jong-Hoon Won<sup>†</sup>, Ok-Kyung Lee, Sang-Soo Lee, Jeong-Hoon Han,  
Orkhon Tsogtbaatar, Sujin Nam, Yeon Kim, and Kyung-Ok Cho\*

### **Supplementary Information**

#### **Table 1. Loss and gain of function phenotypes of *sona*.**

*UAS-sona*, *UAS-sona RNAi-1* and *UAS-sona RNAi-1* were crossed with various *Gal4* lines and the phenotypes of their progeny are summarized.

#### **Table 2. Lethality of *sona* mutants rescued by overexpression of Sona-PA.**

To obtain the total number of progeny including two parental types and both rescued and unrescued nonparental types, both empty pupal cases and dead pupae were counted. The dead pupae should have nonparental genotype. *CyO/CyO* flies are embryonic lethal, so are not counted in total progeny count.

The ratio between paternal, maternal and nonparental genotype as adults should be approximately 1:1:1 if the % rescue is 100%. Under incomplete rescue, a certain fraction of the nonparental progeny dies. Because homozygous *sona* mutants also die during larval stage, not all nonparental types can be counted in total progeny count. Therefore, the number of nonparental types is underestimated, and, accordingly, the % rescue in this table is somewhat overestimated.

#### **Figure S1. Sequence comparison of ADAMTSs and generation of *sona* mutant lines.**

The sequence alignment of human ADAMTS-16, mouse ADAMTS-16, *C. elegans* MIG-17 and *Drosophila* Sona. The color bars indicate different domains of Sona as shown in Figure 1a. The light blue rectangle indicates the conserved active site of the protease domain in

ADAMTS family. The black thick arrow indicates the regions for two *RNAi* lines of *sona*. The vertical arrow indicates glutamic acid (E) residue that was changed to alanine (A) in *SonaE475A* mutation.

**Figure S2. Interommatidial bristles are disoriented especially in dorsal eye.**

(a) Dorsal eye of *w<sup>1118</sup>* as a control. (b) Dorsal eye of *sona<sup>47</sup>/sona<sup>18</sup>* transheterozygous adult.

Arrow indicates the disoriented dorsal interommatidial bristles. These phenotypes were also observed in of *sona<sup>47</sup>/sona<sup>13</sup>* and *sona<sup>13</sup>/sona<sup>18</sup>* transheterozygous escapers.

**Figure S3. SonaE475A does not have any effect on wing development.**

The adult wings of *nub-Gal4/+* flies (a), *nub>sona* flies (b) and *nub>sonaE475A* flies (c).

The flies were cultured at 25°C (a,c) or 18°C (b).

**Figure S4. Sona is absent in the larval extract of *sona* mutants.**

Full-length Sona (arrow) is absent in homozygous *sona<sup>13</sup>*, *sona<sup>18</sup>* and *sona<sup>47</sup>* larval extracts.

The bands marked with asterisks are nonspecific, and their appearance differs among batches of purified antibodies

**Figure S5. Sona is expressed in photoreceptor clusters.**

(a,b) The eye disc of *sona>GFP* was stained with Sona-Pro and GFP antibodies. The squared region in a was magnified in b, and black-and-white images of GFP and Sona-Pro are shown in b' and b'', respectively. (c,d) Similar structure in wild-type eye disc is visualized with Sona-C antibody in c. d is DAB staining for Sona-C antibody as described<sup>1</sup>. (e-h) Negligible level of signal was obtained with Sona-Pro and Sona-C antibodies in *sona<sup>18</sup>* homozygote mutant wing disc (f, h). Scale bar: a, c, 30 μm; e-h, 60 μm.

**Figure S6. Sona-Pro and Sona-C antibodies recognized Sona.**

(a-d) The wing discs of *ptc>GFP, sona-HA* were used to detect HA-tagged Sona with HA antibody, carboxyl region of Sona with Sona-C antibody, and prodomain region of Sona with Sona-Pro antibody. Both Pro and C antibodies recognized spots in the *ptc* region that were also recognized by HA antibody (b',b'',d',d''). **b** or **d** was magnified image of the square on **a** or **c**. Scale bar: **a,c**, 100  $\mu$ m.

**Figure S7. Overexpression of Sona-HA and Sona-mCherry by nub-Gal4 generated malformed wings**

The adult wing phenotypes of *UAS-sona-HA* (**a**) and *UAS-sona-mCherry* (**b**) expressed by *nub-Gal4*. Genotypes are indicated at lower.

**Figure S8. mCherry tag present in Sona-mCherry is not cleaved in both CX and CM.**

Full-length Sona-HA and Sona-mCherry are present in CX. The bands marked with asterisks are nonspecific. In CM, active forms of Sona-HA (black arrow) and Sona-mCherry (red arrow) but no other small cleaved fragments are present. The protein bands were visualized with anti-HA antibody.

**Figure S9. The localization pattern of extracellular Sona and Vkg-GFP**

Sona and Vkg-GFP are expressed in the wing pouch. Vkg-GFP is more widely distributed than Sona. Scale bar: **a-c**, 40  $\mu$ m.

**Figure S10. The level of intracellular Wg is increased by *sona RNAi* expression.**

(a-c) A wing disc expressing *p35* and *GFP* by *ap-Gal4* as a control (a), *GFP* and *sona RNAi* (b), and *p35*, *GFP* and *sona RNAi* (c). Scale bar: a-c, 60  $\mu$ m.

**Figure S11. The extracellular level of Wg in control *ci>GFP* disc.**

Control disc for Figure 6j. No change in the extracellular level of Wg in *ci>GFP* disc. Scale bar: a-c, 60  $\mu$ m.

**Figure S12. Intracellular Wg and Sona-mCherry in *wg>sona-mCherry* discs are enriched in the apical region.**

Cross-section view of the sample used to obtain Fig.7a. Scale bar: 9.5  $\mu$ m.

**Figure S13. The expression levels of both Dll and Vg are reduced in the anterior region of *ci>sona RNAi-2* discs.**

*sona RNAi-2* can reduce the level of Dll and Vg, similar to *sona RNAi-1*. Scale bar: a-b, 60  $\mu$ m.

**Figure S14. Loss of Sona does not affect the transcriptional level of *wg*.**

*sona RNAi* and *GFP* were expressed by *en-Gal4* in *wg-lacZ* transgenic flies and the wing discs were stained for LacZ and GFP. Scale bar: 60  $\mu$ m.

**Reference**

- 1 Choi, K. W. & Benzer, S. Rotation of photoreceptor clusters in the developing *Drosophila* eye requires the *nemo* gene. *Cell* **78**, 125-136 (1994).

Supplementary Table and Figures

Table 1

| <b>Gal4 driver</b>    | <b>Phenotype of Sona over-expression</b>                                       | <b>Phenotype of <i>sona</i> RNAi-1 expression</b>                                                 | <b>Phenotype of <i>sona</i> RNAi-2 expression</b>                                     |
|-----------------------|--------------------------------------------------------------------------------|---------------------------------------------------------------------------------------------------|---------------------------------------------------------------------------------------|
| <i>engrailed-Gal4</i> | Not hatching                                                                   | Pupal lethal (>95%)                                                                               | Pupal lethal (>60%)<br>weak adults<br>minor defects such as folding in posterior wing |
| <i>patched-Gal4</i>   | Not hatching                                                                   | Pupal lethal (>95%)<br>Loss of ACV,<br>Distance between L3 and L4 shortened                       | Pupal lethal (>60%)<br>weak adults                                                    |
| <i>nubbin-Gal4</i>    | No wing,<br>Pupal lethal                                                       | Small wing, loss of vein, D/V detachment                                                          | Small wing                                                                            |
| <i>GMR-Gal4</i>       | No eye,<br>Pupal lethal                                                        | Disordered Eye bristle                                                                            | N/D                                                                                   |
| <i>wg-Gal4</i>        | Small wing,<br>disrupted ocelli bristles                                       | Notched wing, No eye, shorten legs or missing legs                                                | N/D                                                                                   |
| <i>30A-Gal4</i>       | Pupal lethal                                                                   | N/D                                                                                               | N/D                                                                                   |
| <i>sona-Gal4</i>      | Laval to pupal lethal(>90%),<br>impaired larval trachea, small and weak adults | Pupal lethal (>90%),<br>Twisted legs,<br>Disordered eye bristle, small salivary gland, weak adult | N/D                                                                                   |
| <i>hh-Gal4</i>        | N/D                                                                            | Early larval lethal                                                                               | Late pupal lethal (>90%)                                                              |
| <i>act-Gal4</i>       | N/D                                                                            | Early larval lethal                                                                               | Early pupal lethal                                                                    |

**Table 2**

| <b>paternal genotype</b>                                       | <b>maternal genotype</b>                         | <b>genotype of rescued progeny</b>                                      | <b>% rescue</b>                                      |
|----------------------------------------------------------------|--------------------------------------------------|-------------------------------------------------------------------------|------------------------------------------------------|
| <i>nub-Gal4</i><br><i>sona<sup>47</sup></i><br><i>/CyO-GFP</i> | <i>sona<sup>47</sup> UAS-sona</i><br><i>/CyO</i> | <i>nub-Gal4 sona<sup>47</sup>/</i><br><i>sona<sup>47</sup> UAS-sona</i> | 35.7%<br>(12 rescued adults<br>in total 101 progeny) |
| <i>ptc-Gal4</i><br><i>sona<sup>47</sup></i><br><i>/CyO-GFP</i> | <i>sona<sup>47</sup> UAS-sona</i><br><i>/CyO</i> | <i>ptc-Gal4 sona<sup>47</sup></i><br><i>/sona<sup>47</sup> UAS-sona</i> | 23.0%<br>(8 rescued adults<br>in total 104 progeny)  |
| <i>sona<sup>47</sup></i><br><i>/CyO-GFP</i>                    | <i>sona<sup>47</sup> UAS-sona</i><br><i>/CyO</i> | <i>sona<sup>47</sup></i><br><i>/sona<sup>47</sup> UAS-sona</i>          | 0%<br>(0 rescued adult<br>in total 128 progeny)      |

Figure S1

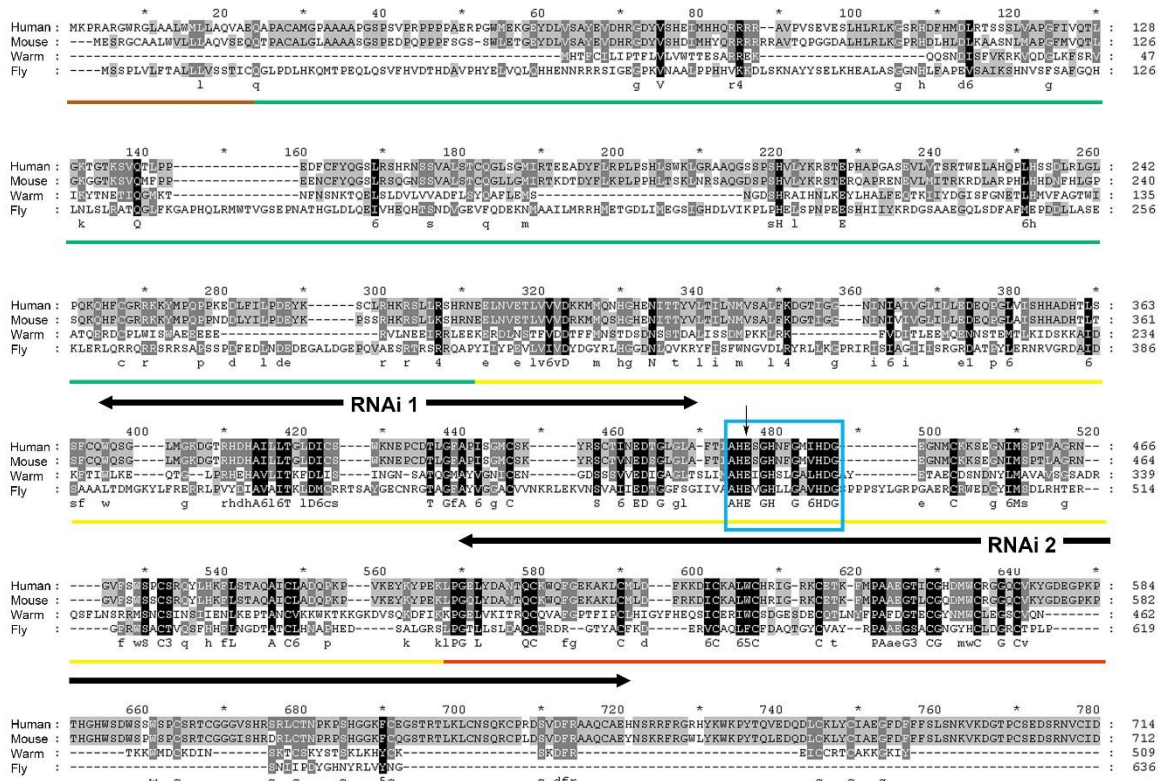

**Figure S2**

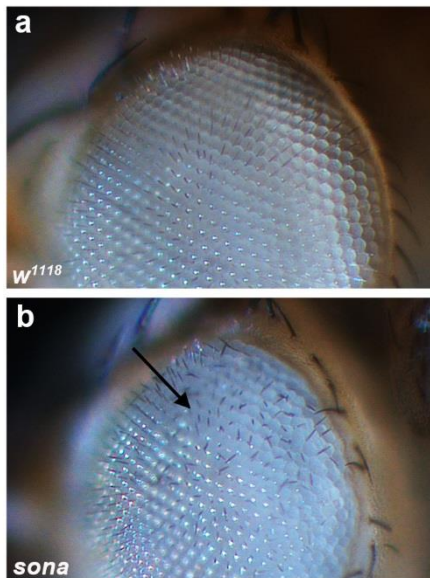



**Figure S3**

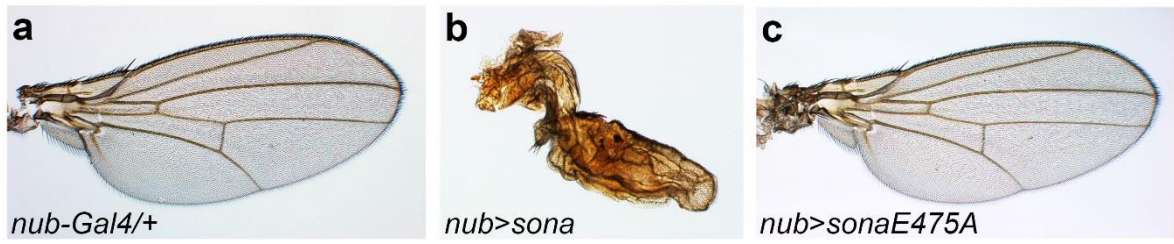

Figure S4

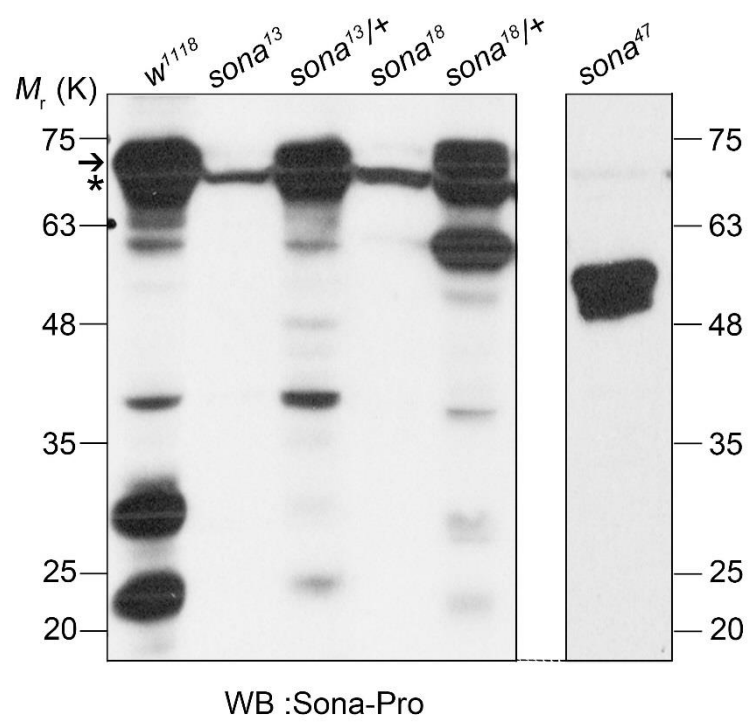

Figure S5

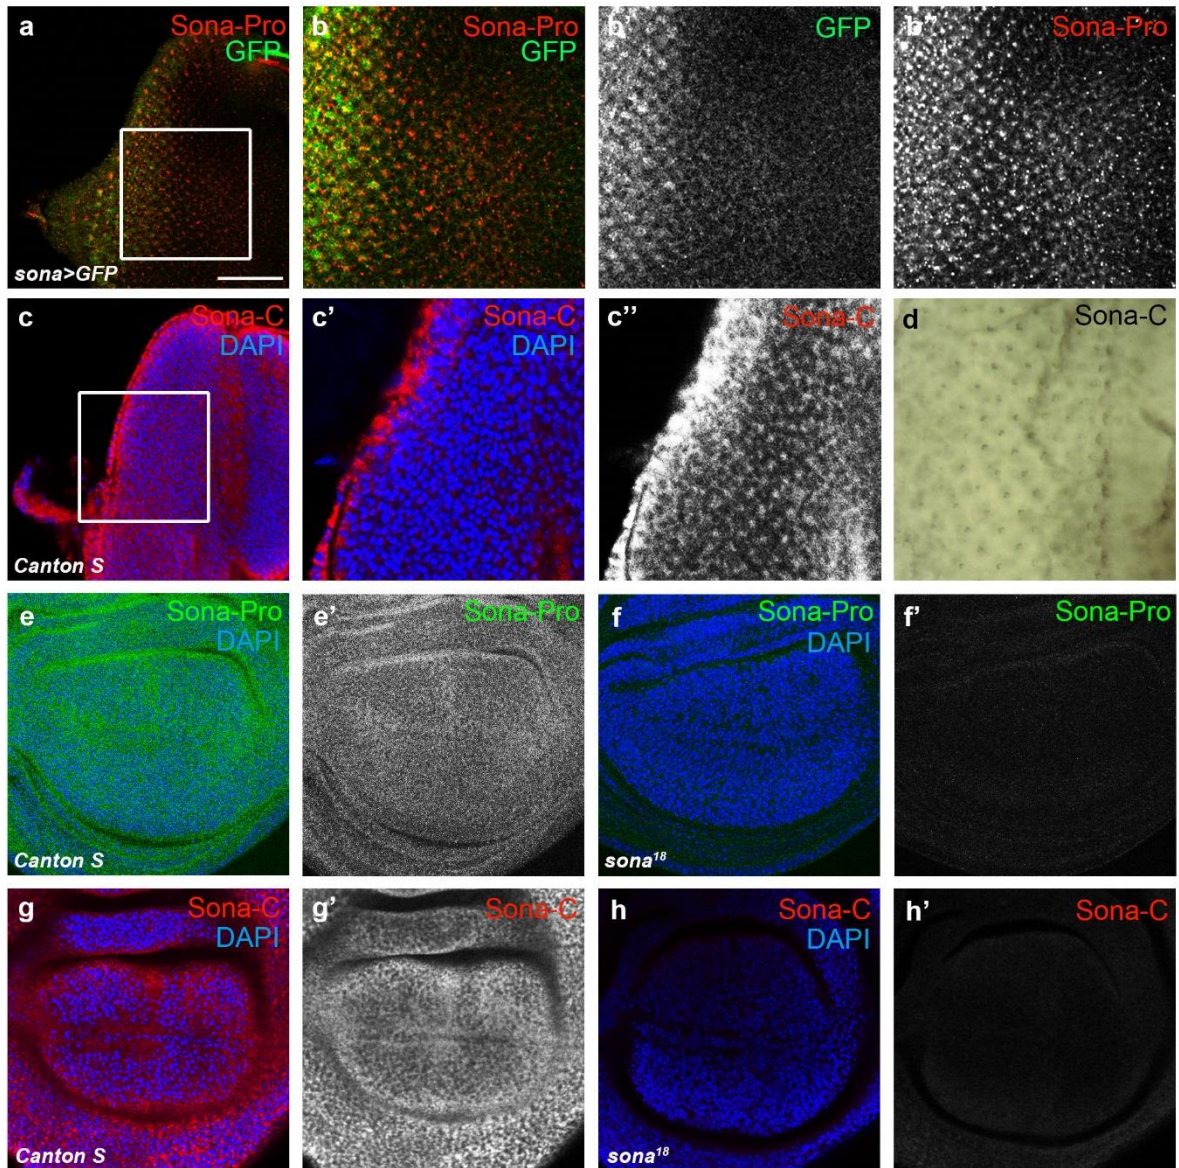

Figure S6

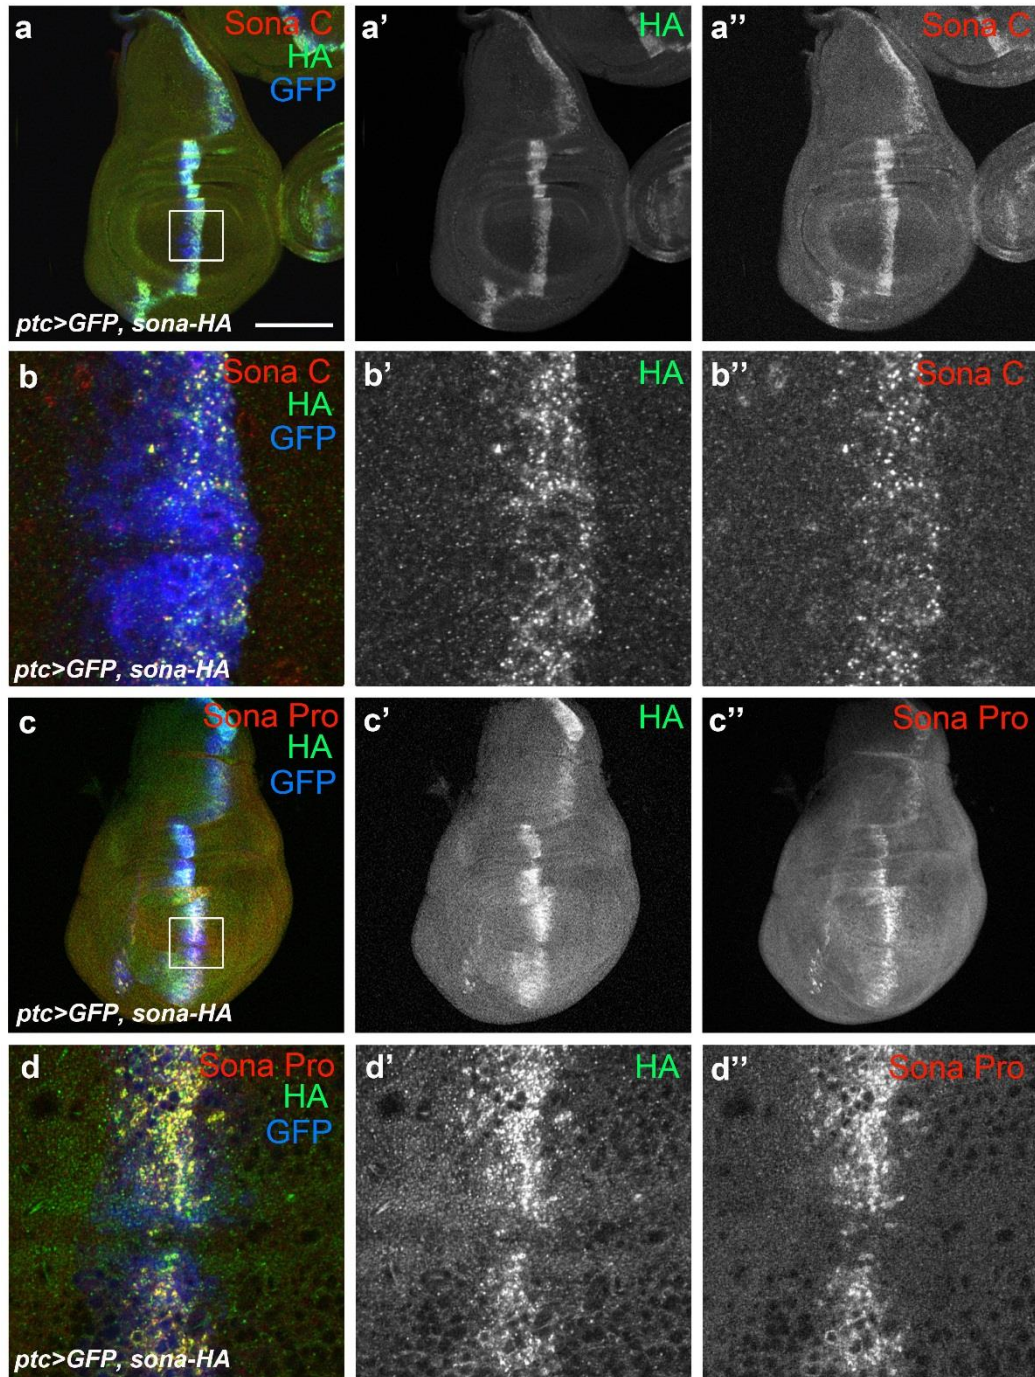

**Figure S7**

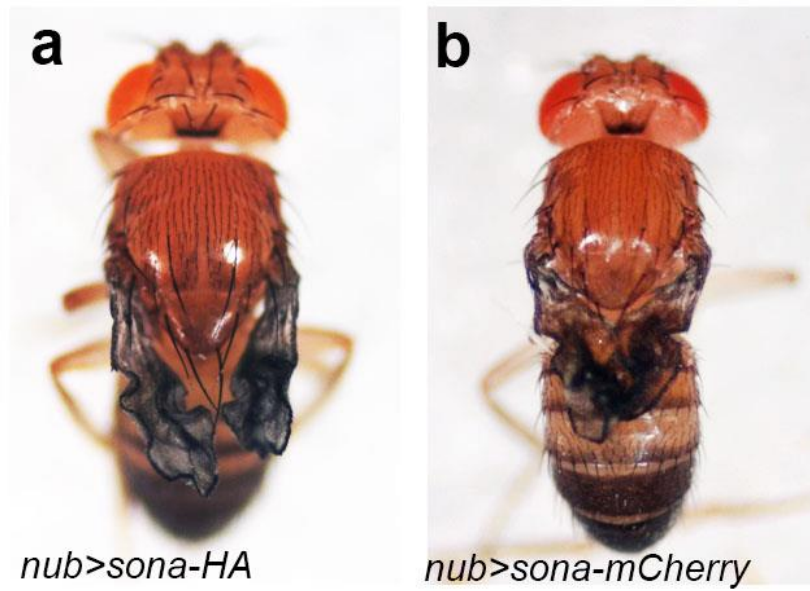

Figure S8

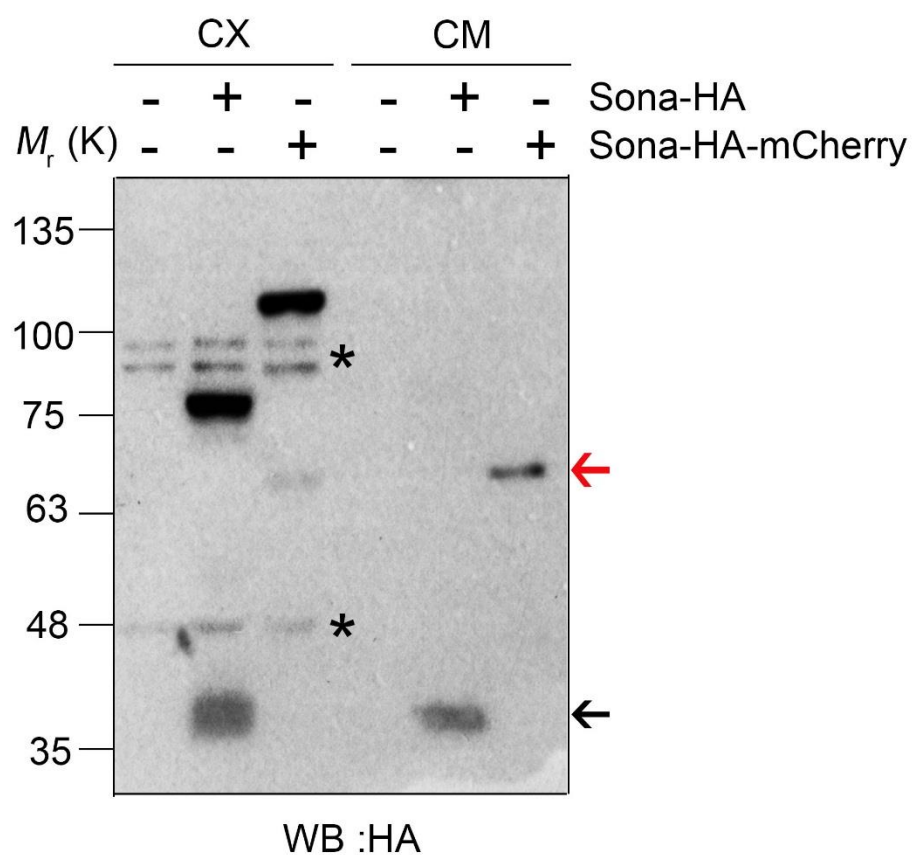

Figure S9

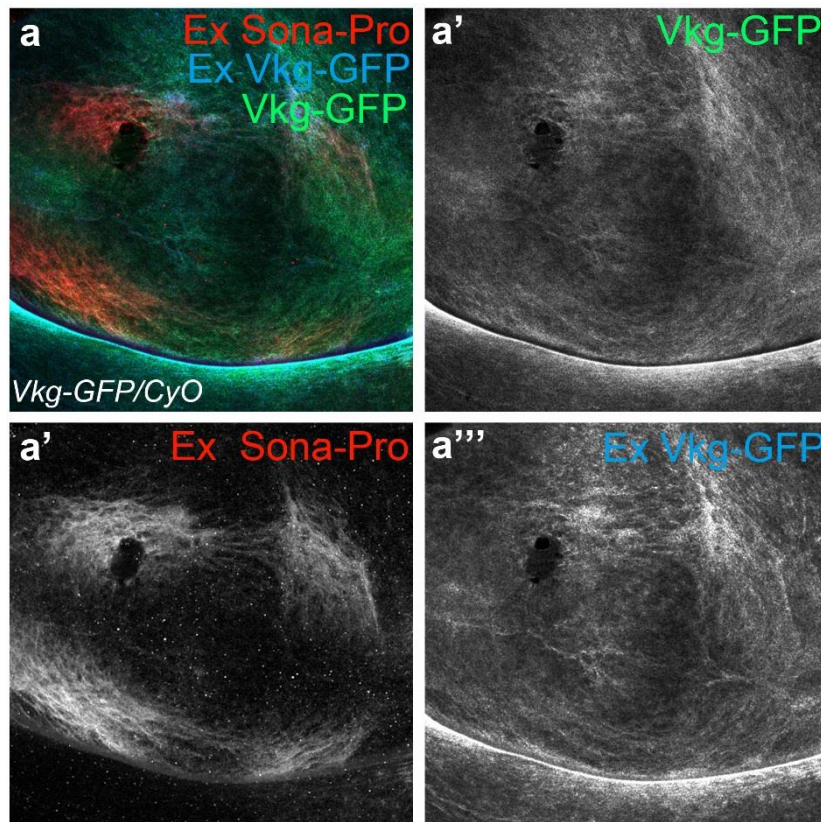

Figure S10

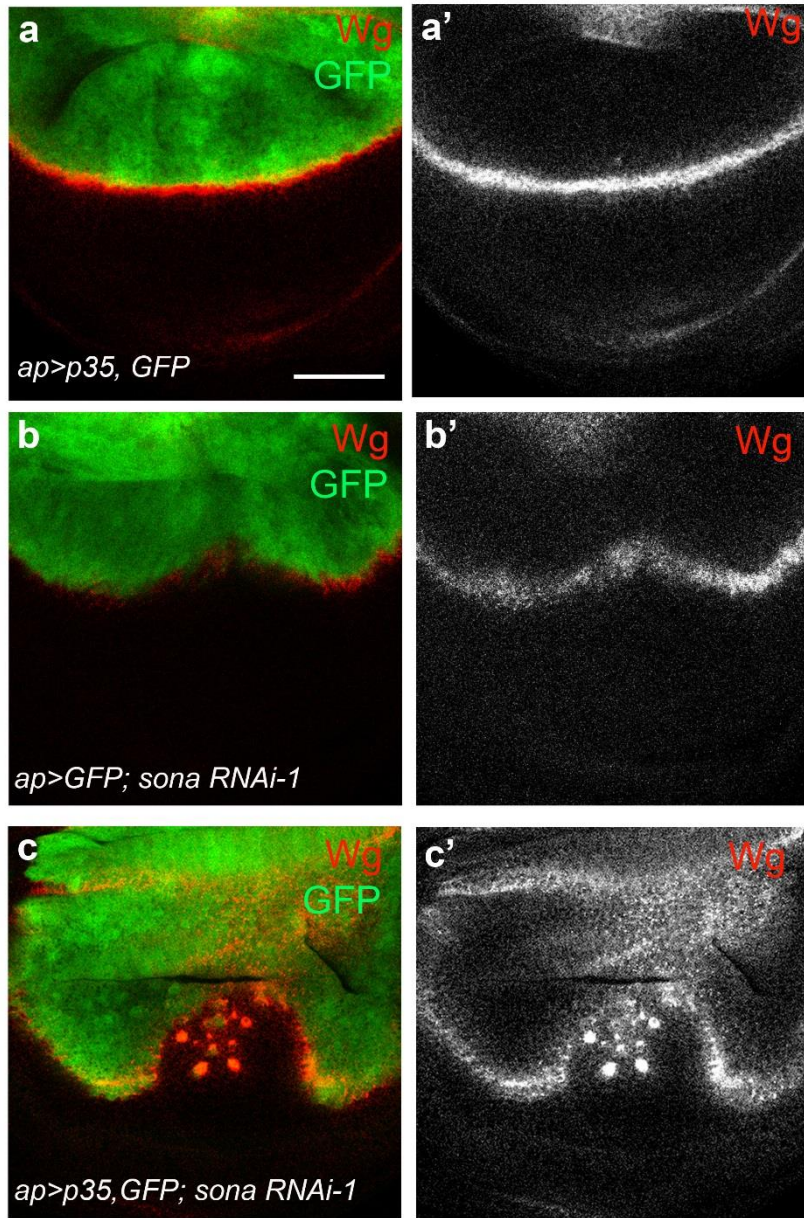



Figure S11

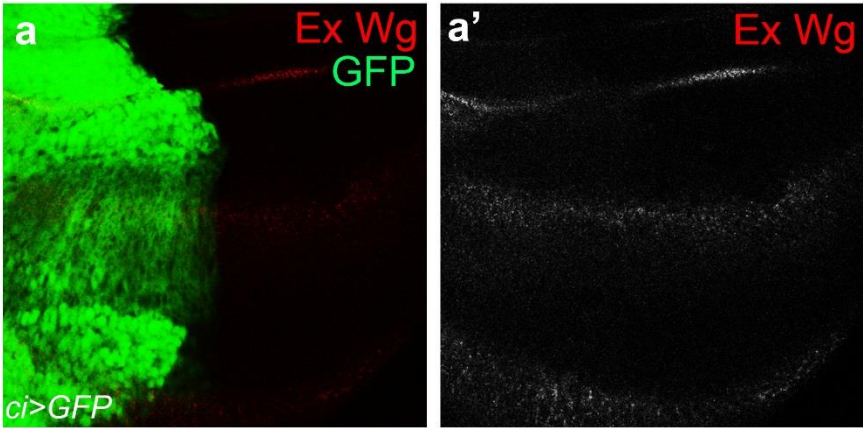

Figure S12

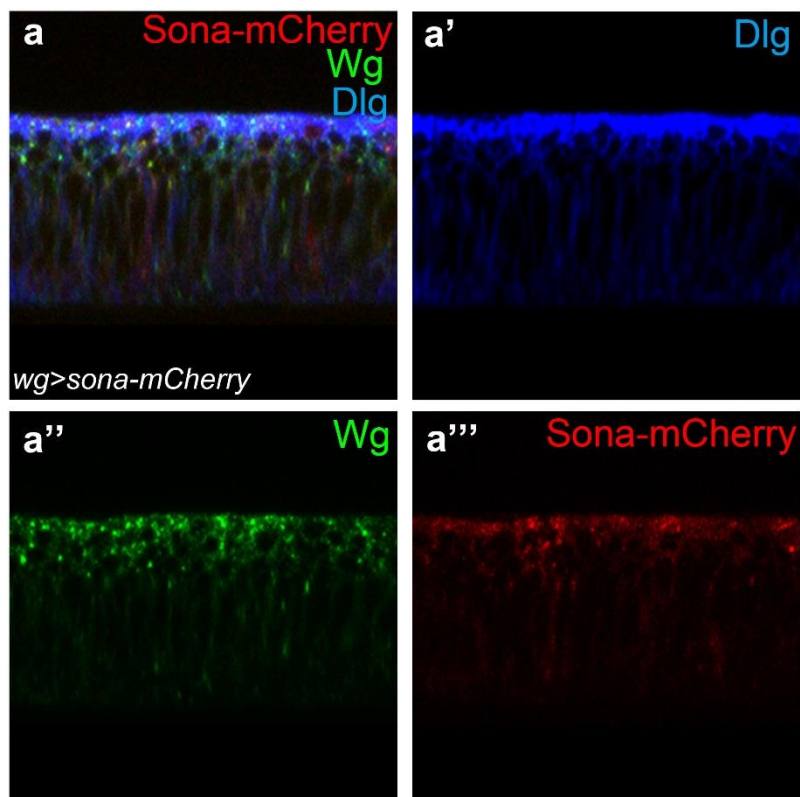

Figure S13

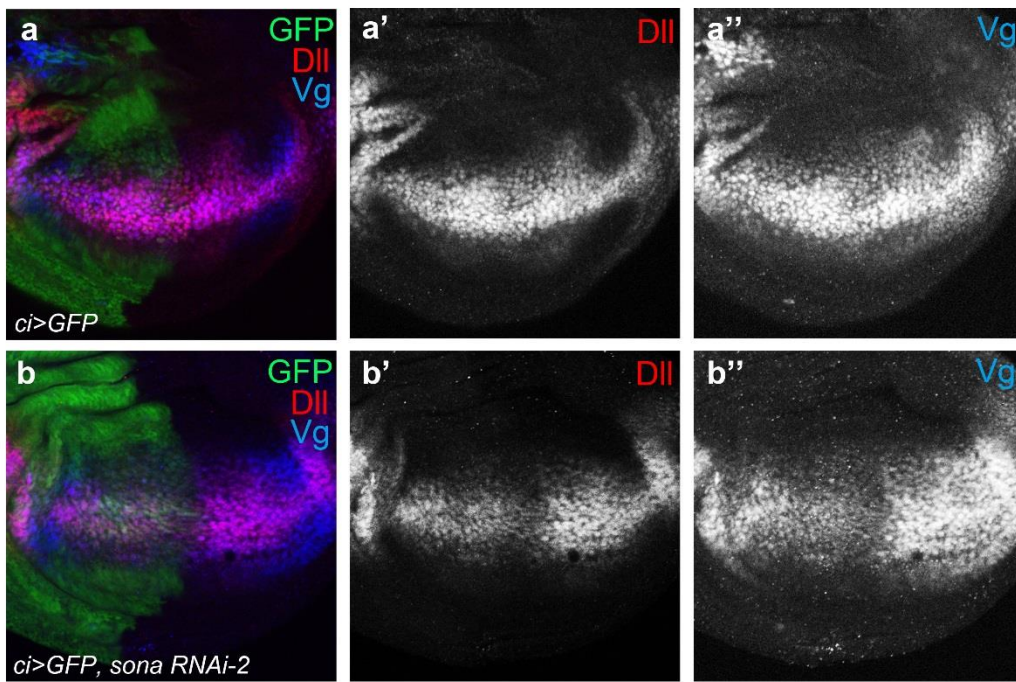

Figure S14

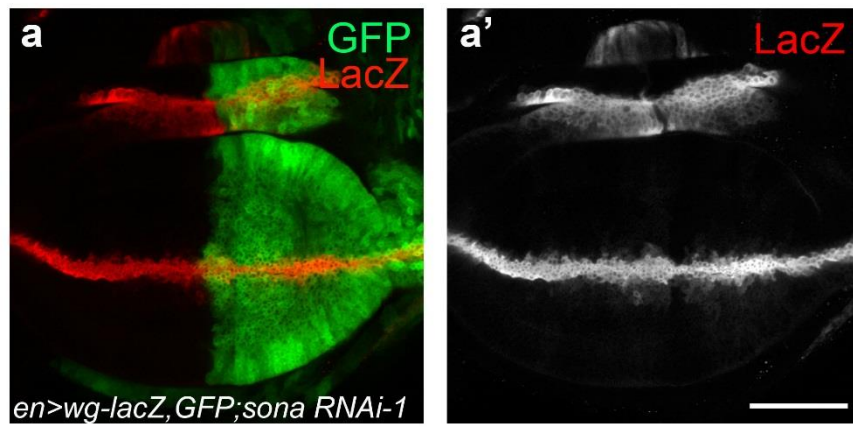

Supplement: srep31863-s1.pdf [file srep31863-s1.pdf]
